# Supplementary material for: Luminescent heteroleptic Eu(iii) probes for the selective detection of diethyl chlorophosphate as a G-series nerve agent mimic in the vapor phase using solid-state films
Source: Royal Society of Chemistry journal article supplement (doi:10.1039/d1tc01685g), 2021-01-01
Supplement: d1tc01685g1.pdf [file d1tc01685g1.pdf]

## Electronic Supplementary Information

**Luminescent heteroleptic Eu(III) probes for the selective detection of diethyl chlorophosphate as G-series nerve agent mimic in the vapor phase using solid-state films**

Zafar Abbas,<sup>a</sup> Usha Yadav,<sup>a</sup> Ray J. Butcher,<sup>b</sup> Ashis K. Patra\*<sup>a</sup>

<sup>a</sup>Department of Chemistry, Indian Institute of Technology Kanpur, Kanpur 208016, Uttar Pradesh, India

<sup>b</sup>Department of Chemistry, Howard University, Washington DC 20059, USA

| <b>Table of Contents</b>                                                                                                                                                                                          | <b>Page No.</b> |
|-------------------------------------------------------------------------------------------------------------------------------------------------------------------------------------------------------------------|-----------------|
| <b>Figure S1:</b> ESI-MS spectral isotopic distribution pattern of <b>Eu(<i>o</i>-OH)</b> with experimental [M-H] <sup>-</sup> molecular ion peak.                                                                | S3              |
| <b>Figure S2:</b> FT-IR spectra of the <b><i>o</i>-HPIP</b> and <b><i>p</i>-HPIP</b> ligands in KBr phase.                                                                                                        | S4              |
| <b>Figure S3:</b> FT-IR spectra of the <b>Eu(<i>o</i>-OH)</b> and <b>Eu(<i>p</i>-OH)</b> complexes in KBr phase.                                                                                                  | S5              |
| <b>Figure S4:</b> Thermogravimetric analysis (TGA) plot of the <b>Eu(<i>o</i>-OH)</b> and <b>Eu(<i>p</i>-OH)</b> complexes.                                                                                       | S6              |
| <b>Figure S5:</b> Perspective drawing of the <b>Eu(<i>o</i>-OH)</b> with twist angle and unit cell packing diagram.                                                                                               | S7              |
| <b>Figure S6:</b> Perspective drawing of the <b>La(<i>o</i>-OH)</b> with twist angle and unit cell packing diagram.                                                                                               | S8              |
| <b>Table S1:</b> Selected crystallographic data and structure refinement parameters of the <b>Eu(<i>o</i>-OH)</b> and <b>La(<i>o</i>-OH)</b> complexes.                                                           | S9              |
| <b>Table S2:</b> Selected bond length and bond angles of the <b>Eu(<i>o</i>-OH)</b> and <b>La(<i>o</i>-OH)</b> structures.                                                                                        | S10             |
| <b>Figure S7:</b> Perspective asymmetric unit drawing of the [ <b>Eu(DHP)<sub>3</sub>]<sub>n</sub></b> , unit cell packing diagram and 1D chain polymeric chain.                                                  | S11             |
| <b>Table S3:</b> Selected crystallographic data and structure refinement parameters of the [ <b>Eu(DHP)<sub>3</sub>]<sub>n</sub></b> .                                                                            | S12             |
| <b>Figure S8:</b> Overlay absorption spectra of the ligands ( <b><i>o/p</i>-HPIP</b> and <b>TTA</b> ), <b>Eu(TTA)<sub>3</sub>·2H<sub>2</sub>O</b> and complex <b>Eu(<i>o</i>-OH)</b> and <b>Eu(<i>p</i>-OH)</b> . | S13             |
| <b>Figure S9:</b> Overlay absorption spectra of the ligands ( <b><i>o/p</i>-HPIP</b> and <b>TTA</b> ) and excitation spectra of complex <b>Eu(<i>o</i>-OH)</b> and <b>Eu(<i>p</i>-OH)</b> .                       | S14             |
| <b>Figure S10:</b> Luminescence decay profile for complex <b>Eu(<i>o</i>-OH)</b> in H <sub>2</sub> O and D <sub>2</sub> O.                                                                                        | S15             |
| <b>Figure S11:</b> Luminescence decay profile for complex <b>Eu(<i>p</i>-OH)</b> in H <sub>2</sub> O and D <sub>2</sub> O.                                                                                        | S16             |
| <b>Figure S12:</b> PL spectra of <b>Eu(<i>o</i>-OH)</b> with the increasing concentration of <b>HCl</b> .                                                                                                         | S17             |
| <b>Figure S13:</b> PL spectra of <b>Eu(<i>o</i>-OH)</b> with the increasing concentration of <b>TEA</b> .                                                                                                         | S18             |
| <b>Figure S14:</b> PL spectra of <b>Eu(<i>o</i>-OH)</b> in the presence of <b>HCl</b> and <b>TEA</b> together.                                                                                                    | S19             |
| <b>Figure S15:</b> PL spectra of <b>Eu(<i>o</i>-OH)</b> with the increasing concentration of <b>NaOH</b> .                                                                                                        | S20             |
| <b>Figure S16:</b> The overlaid <sup>1</sup> H-NMR titration spectra of the <b>La(<i>o</i>-OH)</b> with the addition of DCP in aliphatic region.                                                                  | S21             |
| <b>Figure S17:</b> The overlaid <sup>1</sup> H-NMR titration spectra of the <b>La(<i>o</i>-OH)</b> with the addition of DCP in aromatic region.                                                                   | S22             |
| <b>Figure S18:</b> The overlaid <sup>1</sup> H-NMR titration spectra of the <b>La(<i>o</i>-OH)</b> with the addition of DCP showing the disappearance of broad OH and NH proton signals.                          | S23             |
| <b>Figure S19:</b> <sup>31</sup> P-NMR signals of the <b>La(<i>o</i>-OH)</b> after the addition of DCP.                                                                                                           | S23             |
| <b>Figure S20:</b> Representation of plot for the calculation of limit of detection for <b>Eu(<i>o</i>-OH)</b> .                                                                                                  | S24             |
| <b>Figure S21:</b> Representation of plot for the calculation of limit of detection for <b>Eu(<i>p</i>-OH)</b> .                                                                                                  | S25             |

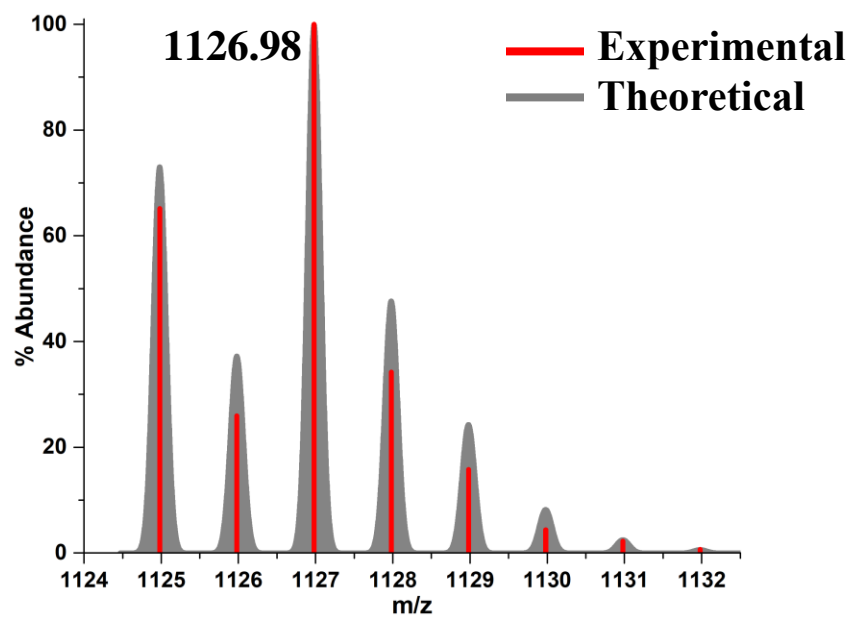

**Figure S1.** ESI-MS spectra of the **Eu(*o*-OH)** in CHCl<sub>3</sub> showing observed molecular ion peak as [M-H]<sup>-</sup> at *m/z* 1126.98 with theoretically predicted isotopic distribution profile.

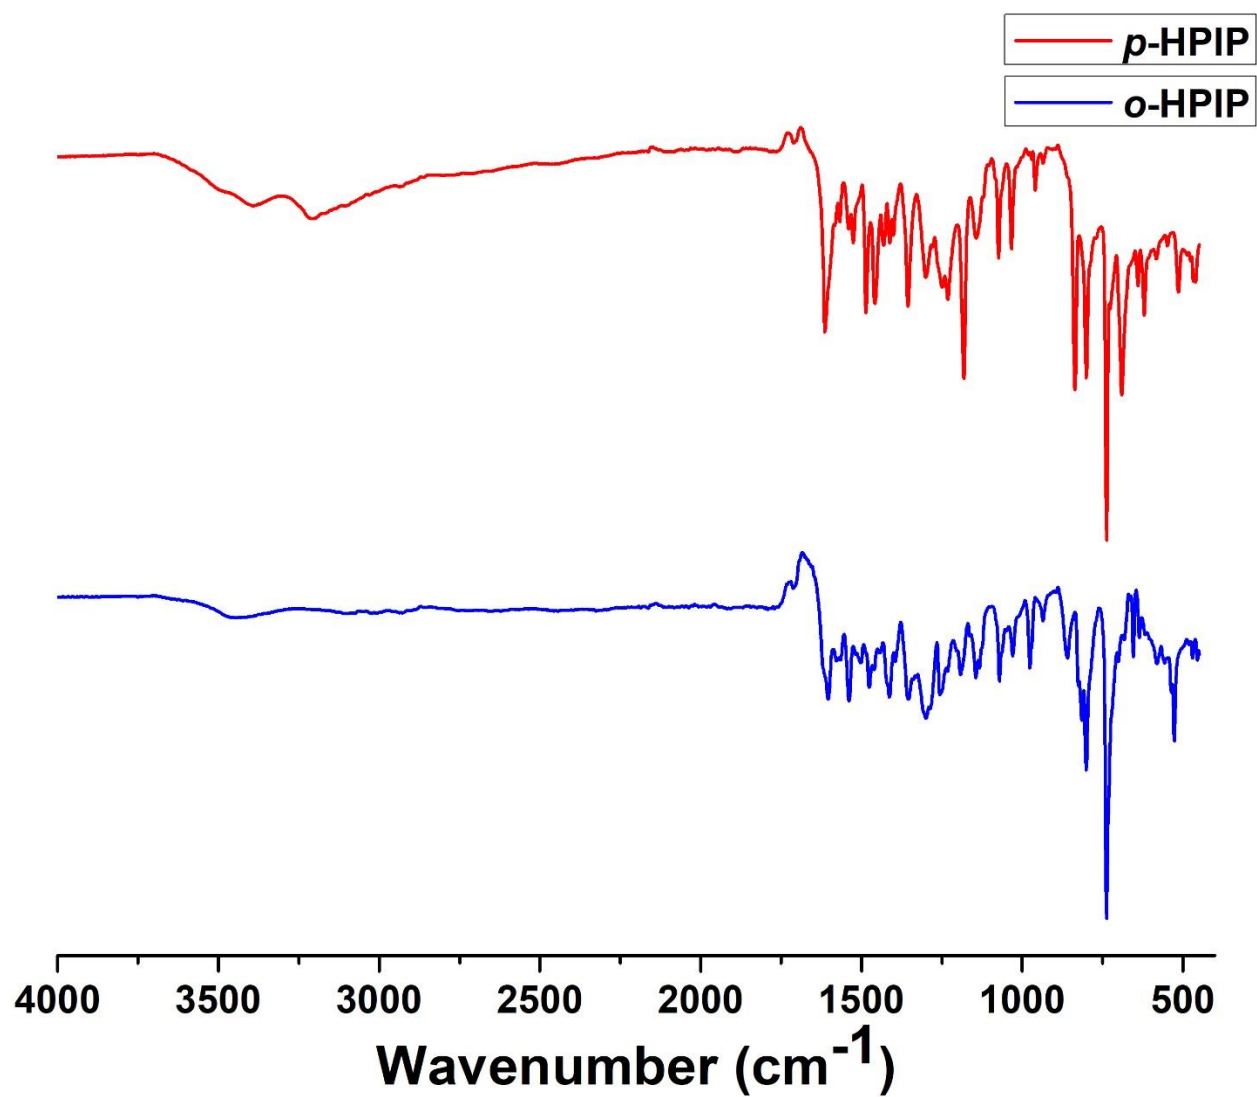

**Figure S2.** FT-IR spectra of *o*-HPIP and *p*-HPIP ligands in solid state using KBr disc in the range 400-4000 cm<sup>-1</sup>.

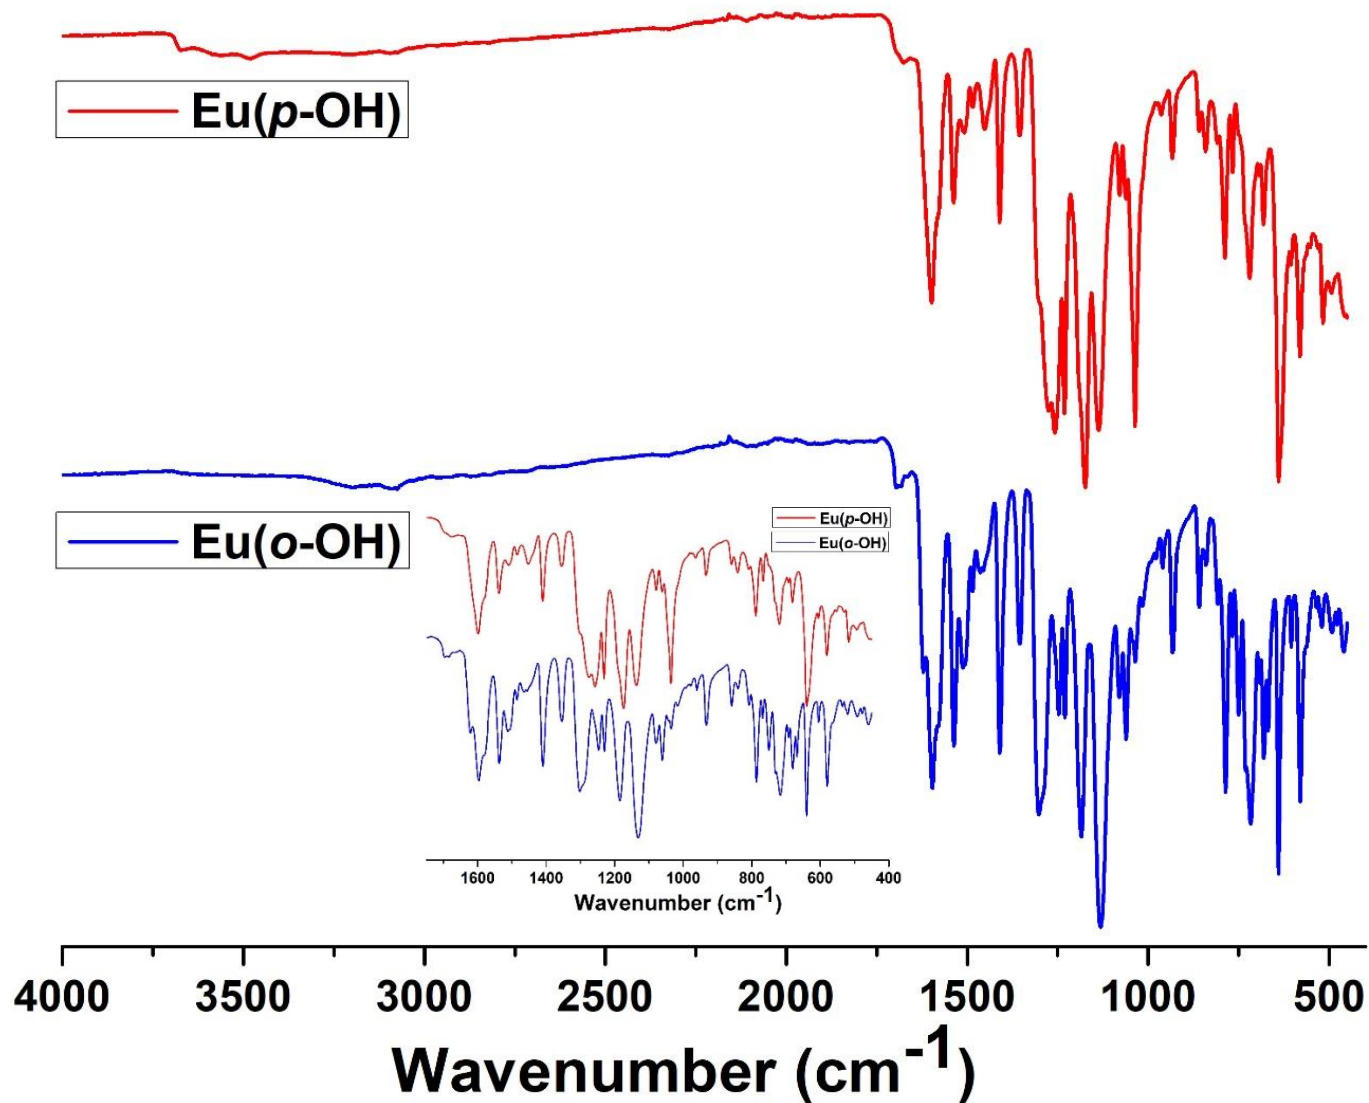

**Figure S3.** FT-IR spectra of **Eu(*o*-OH)** and **Eu(*p*-OH)** complexes in solid state using KBr disc in the range 400-4000 cm<sup>-1</sup>. The inset figure shows the overlay of the FT-IR spectra in fingerprint region.

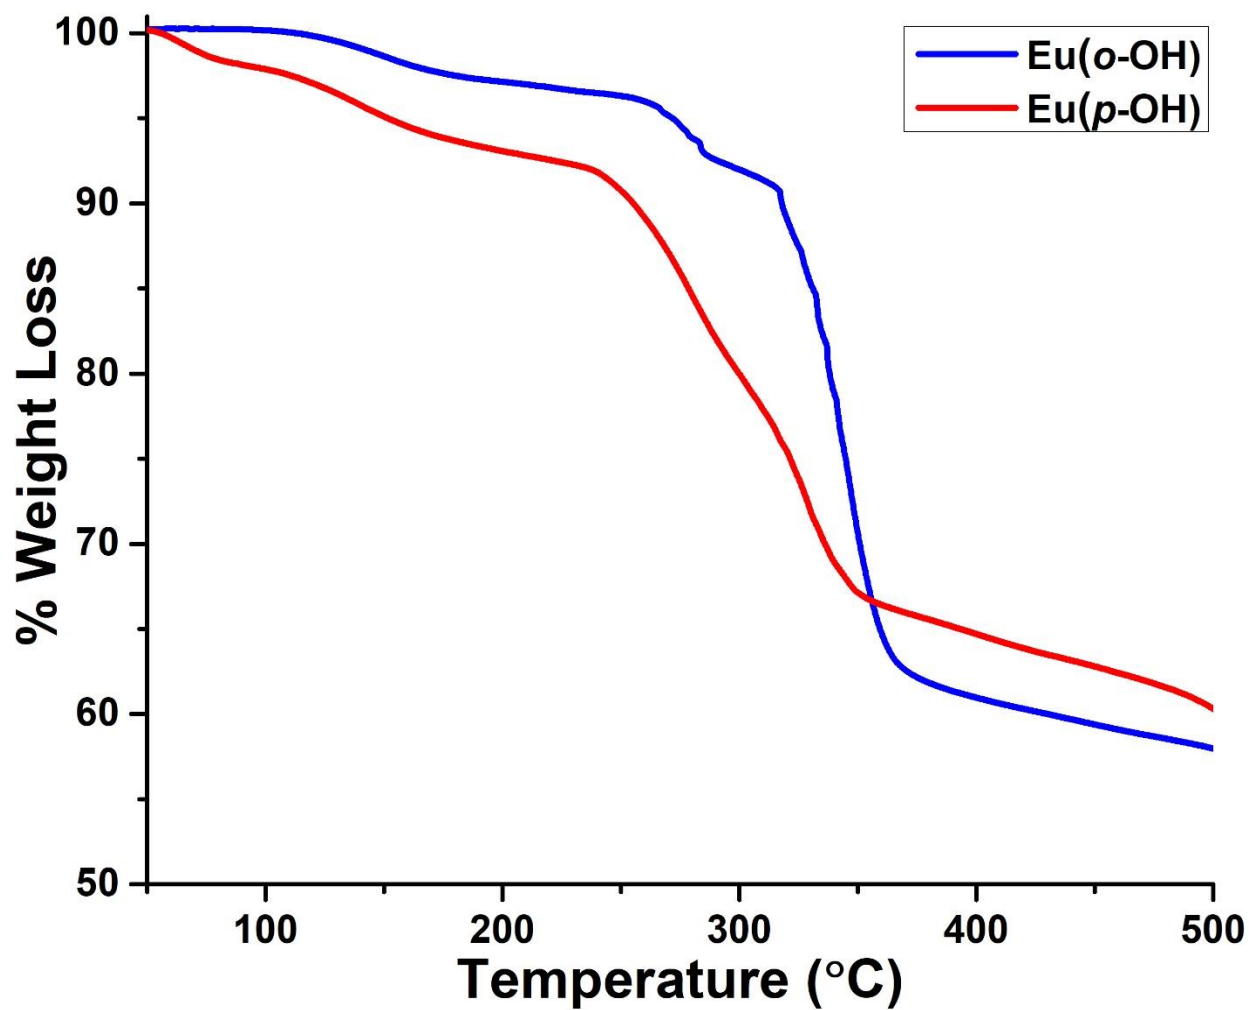

**Figure S4.** TGA plot of the **Eu(o-OH)** and **Eu(p-OH)** complexes at a heating rate of  $10\text{ }^{\circ}\text{C min}^{-1}$  under  $\text{N}_2$  atmosphere.

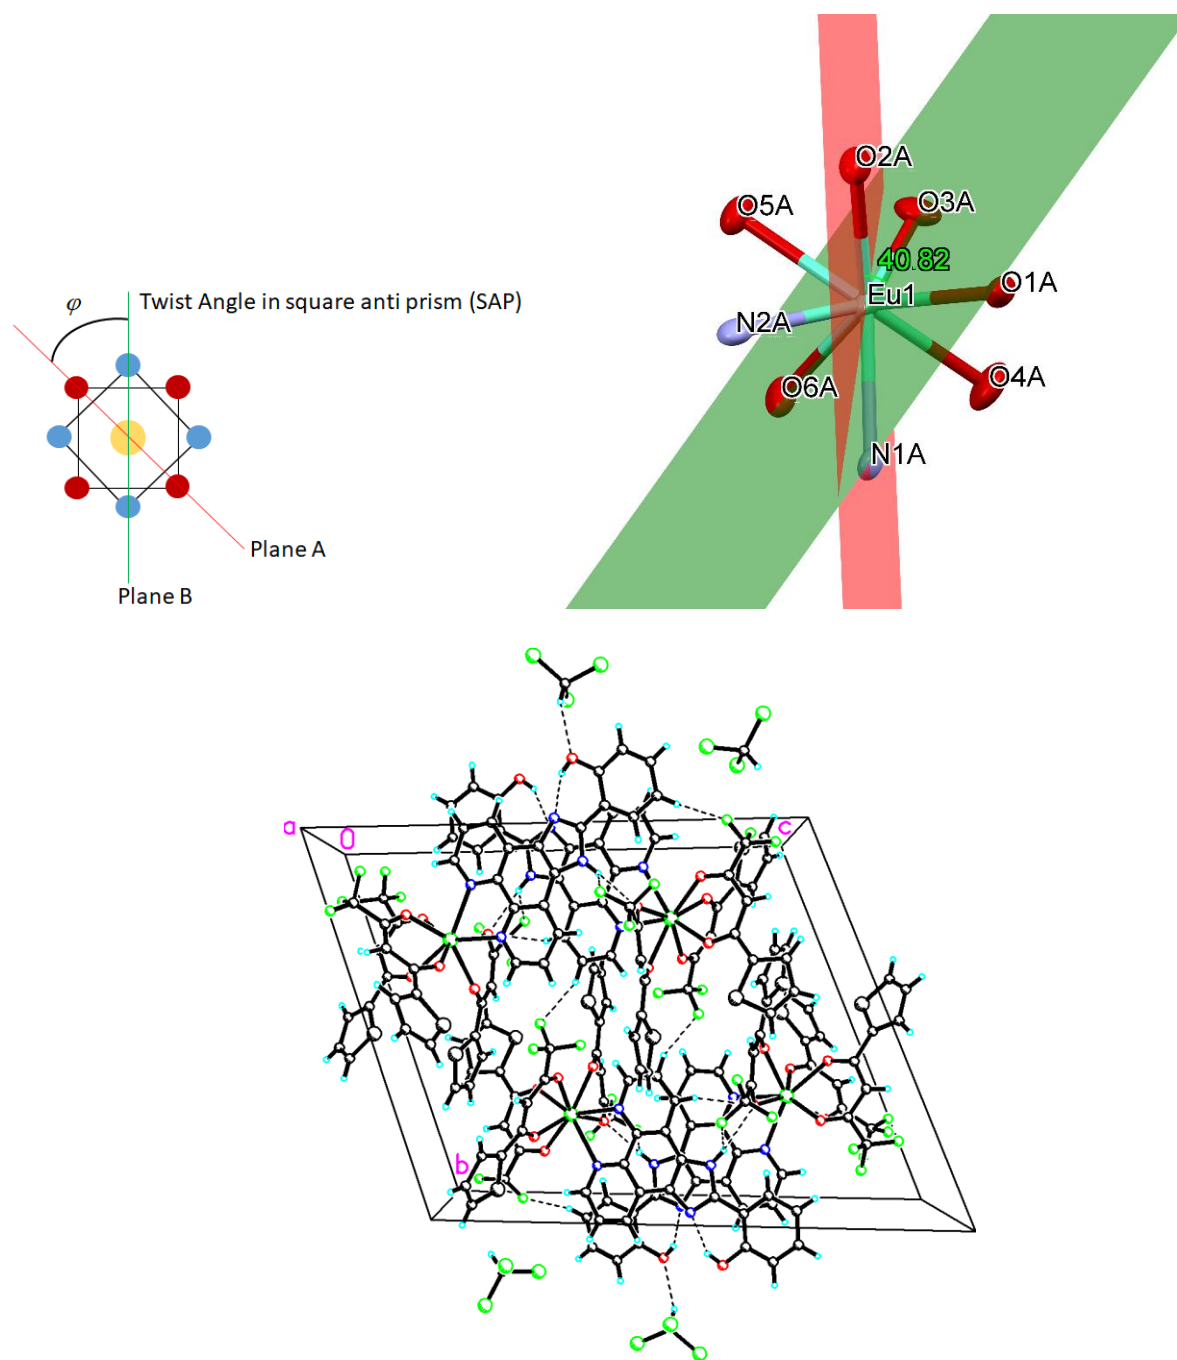

**Figure S5.** Perspective drawing of the  $\text{Eu}(o\text{-OH})$  with twist angle (top) and unit cell packing diagram (bottom) of the  $\text{Eu}(o\text{-OH})$  along b-axis.

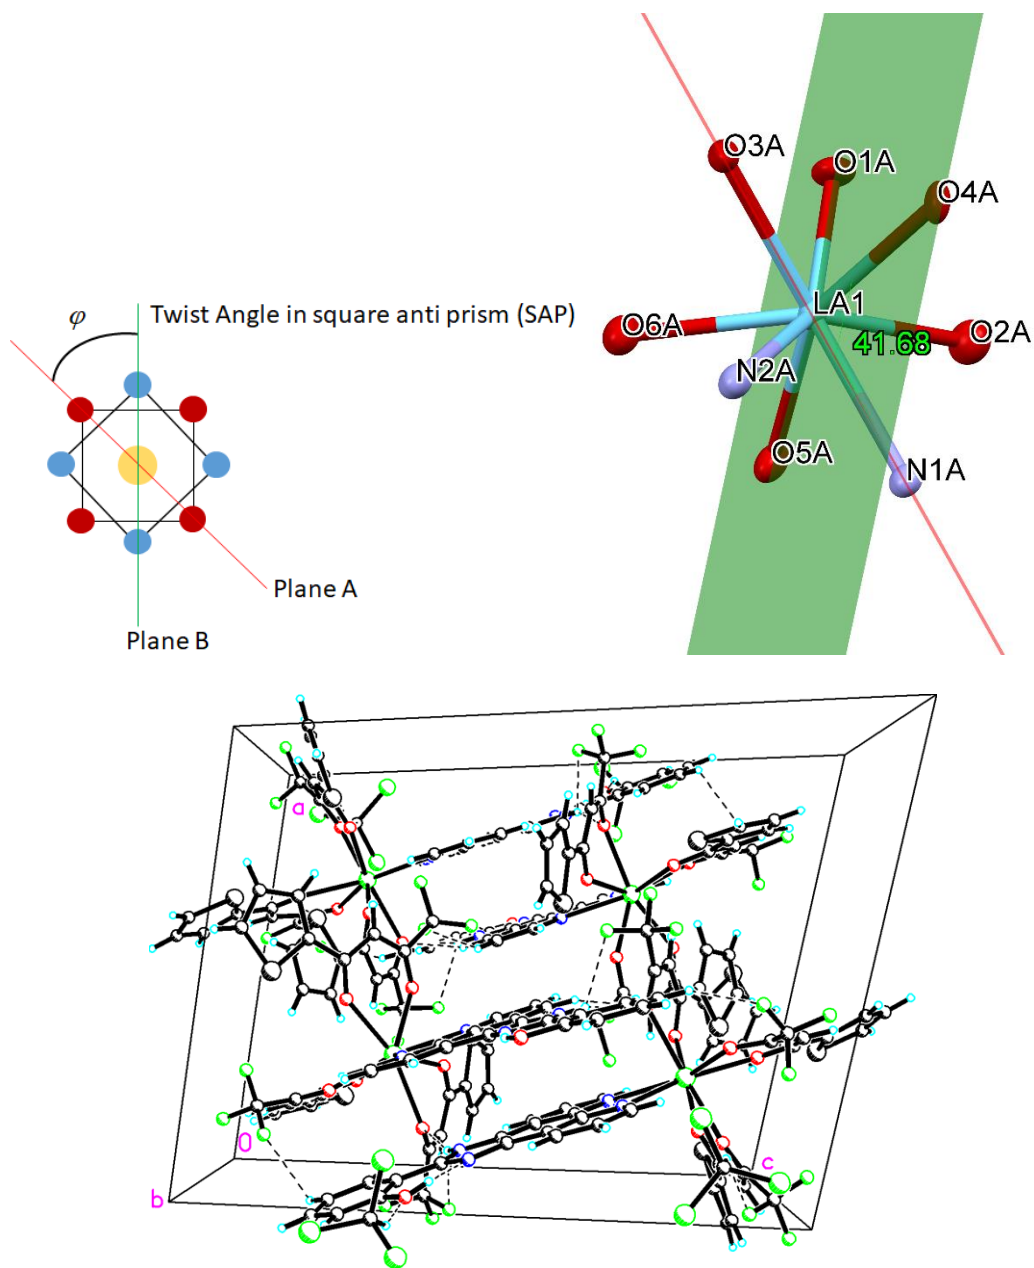

**Figure S6.** Perspective drawing of the  $\text{La}(o\text{-OH})$  with the twist angle (top) and unit cell packing diagram (bottom) of the  $\text{La}(o\text{-OH})$  along b-axis.



**Table S1.** Selected crystallographic data and structure refinement parameters of complexes.

| Parameter                                                                                               | [Eu( <i>o</i> -HPIP)(TTA) <sub>3</sub> ]·(CHCl <sub>3</sub> )                                                 | [La( <i>o</i> -HPIP)(TTA) <sub>3</sub> ]·2(CHCl <sub>3</sub> )                                                |
|---------------------------------------------------------------------------------------------------------|---------------------------------------------------------------------------------------------------------------|---------------------------------------------------------------------------------------------------------------|
| Empirical formula                                                                                       | C <sub>44</sub> H <sub>25</sub> Cl <sub>3</sub> EuF <sub>9</sub> N <sub>4</sub> O <sub>7</sub> S <sub>3</sub> | C <sub>45</sub> H <sub>26</sub> Cl <sub>6</sub> F <sub>9</sub> LaN <sub>4</sub> O <sub>7</sub> S <sub>3</sub> |
| Formula weight                                                                                          | 1247.17                                                                                                       | 1353.49                                                                                                       |
| Crystal system                                                                                          | Triclinic                                                                                                     | Triclinic                                                                                                     |
| Space group                                                                                             | <i>P</i> -1                                                                                                   | <i>P</i> -1                                                                                                   |
| <i>a</i> / Å                                                                                            | 15.4707(13)                                                                                                   | 15.852(3)                                                                                                     |
| <i>b</i> / Å                                                                                            | 17.5731(15)                                                                                                   | 17.886(3)                                                                                                     |
| <i>c</i> / Å                                                                                            | 21.2458(18)                                                                                                   | 21.388(3)                                                                                                     |
| $\alpha$ (deg)                                                                                          | 67.219(3)                                                                                                     | 66.895(4)                                                                                                     |
| $\beta$ (deg)                                                                                           | 76.283(3)                                                                                                     | 73.584(4)                                                                                                     |
| $\gamma$ (deg)                                                                                          | 73.703(3)                                                                                                     | 71.157(4)                                                                                                     |
| Volume (Å <sup>3</sup> )                                                                                | 5057.4(8)                                                                                                     | 5193.7(14)                                                                                                    |
| Z                                                                                                       | 4                                                                                                             | 4                                                                                                             |
| <i>D</i> <sub>x</sub> (Mg m <sup>-3</sup> )                                                             | 1.638                                                                                                         | 1.731                                                                                                         |
| $\mu$ (mm <sup>-1</sup> )                                                                               | 1.607                                                                                                         | 1.338                                                                                                         |
| <i>F</i> (000)                                                                                          | 2464                                                                                                          | 2672                                                                                                          |
| <i>T</i> (K)                                                                                            | 100(2)                                                                                                        | 100(2)                                                                                                        |
| $\theta$ range for data collection(deg)                                                                 | 2.988 to 28.266                                                                                               | 2.281 to 28.327                                                                                               |
| Limiting indices                                                                                        | -20 ≤ <i>h</i> ≤ 20,<br>-23 ≤ <i>k</i> ≤ 23,<br>-28 ≤ <i>l</i> ≤ 28                                           | -21 ≤ <i>h</i> ≤ 21,<br>-23 ≤ <i>k</i> ≤ 23,<br>-28 ≤ <i>l</i> ≤ 28                                           |
| Reflections collected                                                                                   | 80074                                                                                                         | 71657                                                                                                         |
| Unique reflections                                                                                      | 24985                                                                                                         | 25777                                                                                                         |
| <i>R</i> (int)                                                                                          | 0.1393                                                                                                        | 0.0909                                                                                                        |
| Data/restraint/parameter                                                                                | 24985 / 2059 / 1411                                                                                           | 25777 / 1245 / 1651                                                                                           |
| GOF on <i>F</i> <sup>2</sup>                                                                            | 1.106                                                                                                         | 1.083                                                                                                         |
| <i>R</i> <sub>1</sub> <sup>a</sup> and <i>wR</i> <sub>2</sub> <sup>b</sup> [ <i>I</i> > 2σ( <i>I</i> )] | 0.1443 and 0.2783                                                                                             | 0.0879 and 0.1696                                                                                             |
| <i>R</i> <sub>1</sub> and <i>wR</i> <sub>2</sub> (all data)                                             | 0.2099 and 0.3108                                                                                             | 0.1388 and 0.1912                                                                                             |
| Largest diff. peak and hole (e.Å <sup>-3</sup> )                                                        | 2.197 and -4.106                                                                                              | 2.528 and -1.509                                                                                              |
| CCDC deposition number                                                                                  | 2049309                                                                                                       | 2049310                                                                                                       |

<sup>a</sup>  $R_1 = \sum ||F_0| - |F_C|| / \sum |F_0|$ . <sup>b</sup>  $wR_2 = \{ \sum [w(F_0^2 - F_C^2)] / \sum [w(F_0^2)^2] \}^{1/2}$ .

**Table S2.** Selected bond lengths [ $\text{\AA}$ ] and bond angles [ $^\circ$ ] for **Eu(*o*-OH)** and **La(*o*-OH)**.

| <b>[Eu(<i>o</i>-HPIP)(TTA)<sub>3</sub>]</b> |                                              | <b>[La(<i>o</i>-HPIP)(TTA)<sub>3</sub>]</b> |                                              |
|---------------------------------------------|----------------------------------------------|---------------------------------------------|----------------------------------------------|
|                                             | <b>Bond Length (<math>\text{\AA}</math>)</b> |                                             | <b>Bond Length (<math>\text{\AA}</math>)</b> |
| Eu(1)-O(1A)                                 | 2.340(10)                                    | La(1)-O(1A)                                 | 2.445(5)                                     |
| Eu(1)-O(2A)                                 | 2.373(9)                                     | La(1)-O(2A)                                 | 2.449(5)                                     |
| Eu(1)-O(3A)                                 | 2.375(11)                                    | La(1)-O(6A)                                 | 2.457(5)                                     |
| Eu(1)-O(5A)                                 | 2.383(9)                                     | La(1)-O(5A)                                 | 2.457(5)                                     |
| Eu(1)-O(4A)                                 | 2.388(10)                                    | La(1)-O(3A)                                 | 2.479(5)                                     |
| Eu(1)-O(6A)                                 | 2.413(9)                                     | La(1)-O(4A)                                 | 2.531(5)                                     |
| Eu(1)-N(1A)                                 | 2.623(11)                                    | La(1)-N(1A)                                 | 2.728(6)                                     |
| Eu(1)-N(2A)                                 | 2.545(12)                                    | La(1)-N(2A)                                 | 2.673(6)                                     |
|                                             | <b>Bond Angles (<math>^\circ</math>)</b>     |                                             | <b>Bond Angles (<math>^\circ</math>)</b>     |
| O(1A)-Eu(1)-O(2A)                           | 71.1(3)                                      | O(4B)-La(2)-O(1B)                           | 134.12(19)                                   |
| O(1A)-Eu(1)-O(3A)                           | 98.6(4)                                      | O(4B)-La(2)-O(3B)                           | 69.65(19)                                    |
| O(2A)-Eu(1)-O(3A)                           | 89.2(3)                                      | O(1B)-La(2)-O(3B)                           | 78.3(2)                                      |
| O(1A)-Eu(1)-O(5A)                           | 141.8(3)                                     | O(4B)-La(2)-O(5B)                           | 120.16(19)                                   |
| O(2A)-Eu(1)-O(5A)                           | 71.9(3)                                      | O(1B)-La(2)-O(5B)                           | 78.31(17)                                    |
| O(3A)-Eu(1)-O(5A)                           | 71.5(4)                                      | O(3B)-La(2)-O(5B)                           | 73.25(19)                                    |
| O(1A)-Eu(1)-O(4A)                           | 73.3(4)                                      | O(4B)-La(2)-O(2B)                           | 75.48(19)                                    |
| O(2A)-Eu(1)-O(4A)                           | 136.1(4)                                     | O(1B)-La(2)-O(2B)                           | 70.09(17)                                    |
| O(3A)-Eu(1)-O(4A)                           | 71.4(4)                                      | O(3B)-La(2)-O(2B)                           | 85.6(2)                                      |
| O(5A)-Eu(1)-O(4A)                           | 132.0(4)                                     | O(5B)-La(2)-O(2B)                           | 144.98(17)                                   |
| O(1A)-Eu(1)-O(6A)                           | 146.7(3)                                     | O(4B)-La(2)-O(6B)                           | 77.58(18)                                    |
| O(2A)-Eu(1)-O(6A)                           | 142.0(3)                                     | O(1B)-La(2)-O(6B)                           | 144.45(17)                                   |
| O(3A)-Eu(1)-O(6A)                           | 86.9(3)                                      | O(3B)-La(2)-O(6B)                           | 106.2(2)                                     |
| O(5A)-Eu(1)-O(6A)                           | 71.1(3)                                      | O(5B)-La(2)-O(6B)                           | 69.79(17)                                    |
| O(4A)-Eu(1)-O(6A)                           | 77.5(4)                                      | O(2B)-La(2)-O(6B)                           | 144.46(16)                                   |
| O(1A)-Eu(1)-N(2A)                           | 103.5(4)                                     | O(4B)-La(2)-N(1B)                           | 93.04(18)                                    |
| O(2A)-Eu(1)-N(2A)                           | 73.3(3)                                      | O(1B)-La(2)-N(1B)                           | 108.78(18)                                   |
| O(3A)-Eu(1)-N(2A)                           | 145.2(4)                                     | O(3B)-La(2)-N(1B)                           | 159.41(19)                                   |
| O(5A)-Eu(1)-N(2A)                           | 74.5(4)                                      | O(5B)-La(2)-N(1B)                           | 126.66(18)                                   |
| O(4A)-Eu(1)-N(2A)                           | 140.8(4)                                     | O(2B)-La(2)-N(1B)                           | 79.05(17)                                    |
| O(6A)-Eu(1)-N(2A)                           | 89.0(3)                                      | O(6B)-La(2)-N(1B)                           | 79.67(16)                                    |
| O(1A)-Eu(1)-N(1A)                           | 76.3(3)                                      | O(4B)-La(2)-N(2B)                           | 150.52(19)                                   |
| O(2A)-Eu(1)-N(1A)                           | 116.4(4)                                     | O(1B)-La(2)-N(2B)                           | 71.67(18)                                    |
| O(3A)-Eu(1)-N(1A)                           | 149.4(3)                                     | O(3B)-La(2)-N(2B)                           | 138.60(19)                                   |
| O(5A)-Eu(1)-N(1A)                           | 130.2(3)                                     | O(5B)-La(2)-N(2B)                           | 73.32(18)                                    |
| O(4A)-Eu(1)-N(1A)                           | 78.3(4)                                      | O(2B)-La(2)-N(2B)                           | 109.19(17)                                   |
| O(6A)-Eu(1)-N(1A)                           | 82.4(3)                                      | O(6B)-La(2)-N(2B)                           | 84.22(17)                                    |
| N(2A)-Eu(1)-N(1A)                           | 63.4(3)                                      | N(1B)-La(2)-N(2B)                           | 60.70(18)                                    |

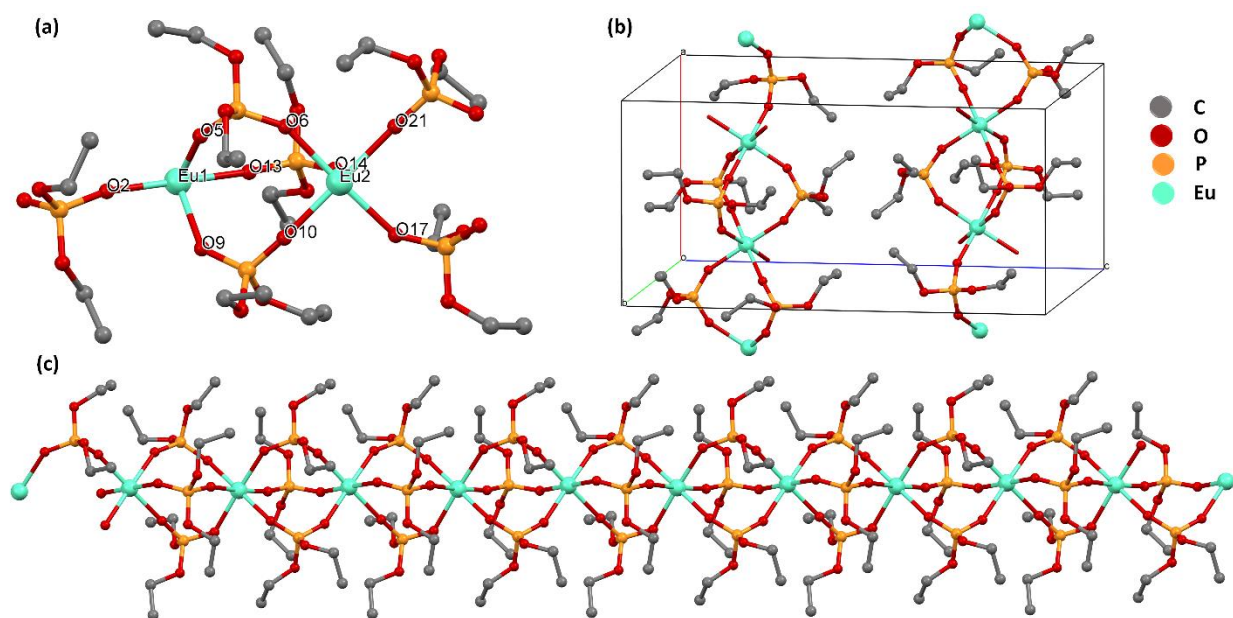

**Figure S7.** **a)** Asymmetric unit of  $[\text{Eu}(\text{DHP})_3]_n$  polymer chain; **b)** Unit cell diagram of the  $[\text{Eu}(\text{DHP})_3]_n$  structure viewed along b-axis; **c)** A view of the 1-D chain showing Eu(III) ion forming a chain having three bridging DHPs between the two ions. Hydrogen atoms are omitted for clarity.

**Table S3.** Selected crystallographic data and structure refinement parameters of **Eu(*o*-OH)** and DCP reaction product: [Eu(DHP)<sub>3</sub>]<sub>n</sub>.

| Parameters                                                                                                                                                      | [Eu(DHP) <sub>3</sub> ] <sub>n</sub>                                           |
|-----------------------------------------------------------------------------------------------------------------------------------------------------------------|--------------------------------------------------------------------------------|
| Empirical formula                                                                                                                                               | C <sub>24</sub> H <sub>60</sub> Eu <sub>2</sub> O <sub>24</sub> P <sub>6</sub> |
| Formula weight                                                                                                                                                  | 1222.46                                                                        |
| Crystal system                                                                                                                                                  | Triclinic                                                                      |
| Space group                                                                                                                                                     | <i>P</i> -1                                                                    |
| <i>a</i> Å                                                                                                                                                      | 10.1425(15)                                                                    |
| <i>b</i> Å                                                                                                                                                      | 11.2668(17)                                                                    |
| <i>c</i> Å                                                                                                                                                      | 20.708(3)                                                                      |
| $\alpha$ (deg)                                                                                                                                                  | 101.038(4)                                                                     |
| $\beta$ (deg)                                                                                                                                                   | 90.599(4)                                                                      |
| $\gamma$ (deg)                                                                                                                                                  | 91.973(4)                                                                      |
| Volume Å <sup>3</sup>                                                                                                                                           | 2320.8(6)                                                                      |
| <i>Z</i>                                                                                                                                                        | 2                                                                              |
| <i>D<sub>x</sub></i> (Mg m <sup>-3</sup> )                                                                                                                      | 1.749                                                                          |
| $\mu$ (mm <sup>-1</sup> )                                                                                                                                       | 2.960                                                                          |
| <i>F</i> (000)                                                                                                                                                  | 1224                                                                           |
| <i>T</i> (K)                                                                                                                                                    | 100(2)                                                                         |
| $\theta$ range for data collection(deg)                                                                                                                         | 4.46 to 50.1                                                                   |
| Limiting indices                                                                                                                                                | -12 ≤ <i>h</i> ≤ 12,<br>-13 ≤ <i>k</i> ≤ 13,<br>-24 ≤ <i>l</i> ≤ 24            |
| Reflections collected                                                                                                                                           | 24255                                                                          |
| Unique reflections                                                                                                                                              | 8005                                                                           |
| <i>R</i> (int)                                                                                                                                                  | 0.0619                                                                         |
| Data/restraint/parameter                                                                                                                                        | 8005 / 0 / 499                                                                 |
| GOF on <i>F</i> <sup>2</sup>                                                                                                                                    | 1.163                                                                          |
| <i>R</i> <sub>1</sub> <sup>a</sup> and <i>wR</i> <sub>2</sub> <sup>b</sup> [ <i>I</i> > 2σ( <i>I</i> )]                                                         | 0.0565 and 0.1194                                                              |
| <i>R</i> <sub>1</sub> and <i>wR</i> <sub>2</sub> (all data)                                                                                                     | 0.0724 and 0.1278                                                              |
| Largest diff. peak and hole (e.Å <sup>-3</sup> )                                                                                                                | 1.96 and -1.58                                                                 |
| CCDC deposition number                                                                                                                                          | 2069827                                                                        |
| <sup>a</sup> $R_1 = \frac{\sum   F_0  -  F_c  }{\sum  F_0 }$ . <sup>b</sup> $wR_2 = \left\{ \frac{\sum [w(F_0^2 - F_c^2)]}{\sum [w(F_0^2)^2]} \right\}^{1/2}$ . |                                                                                |

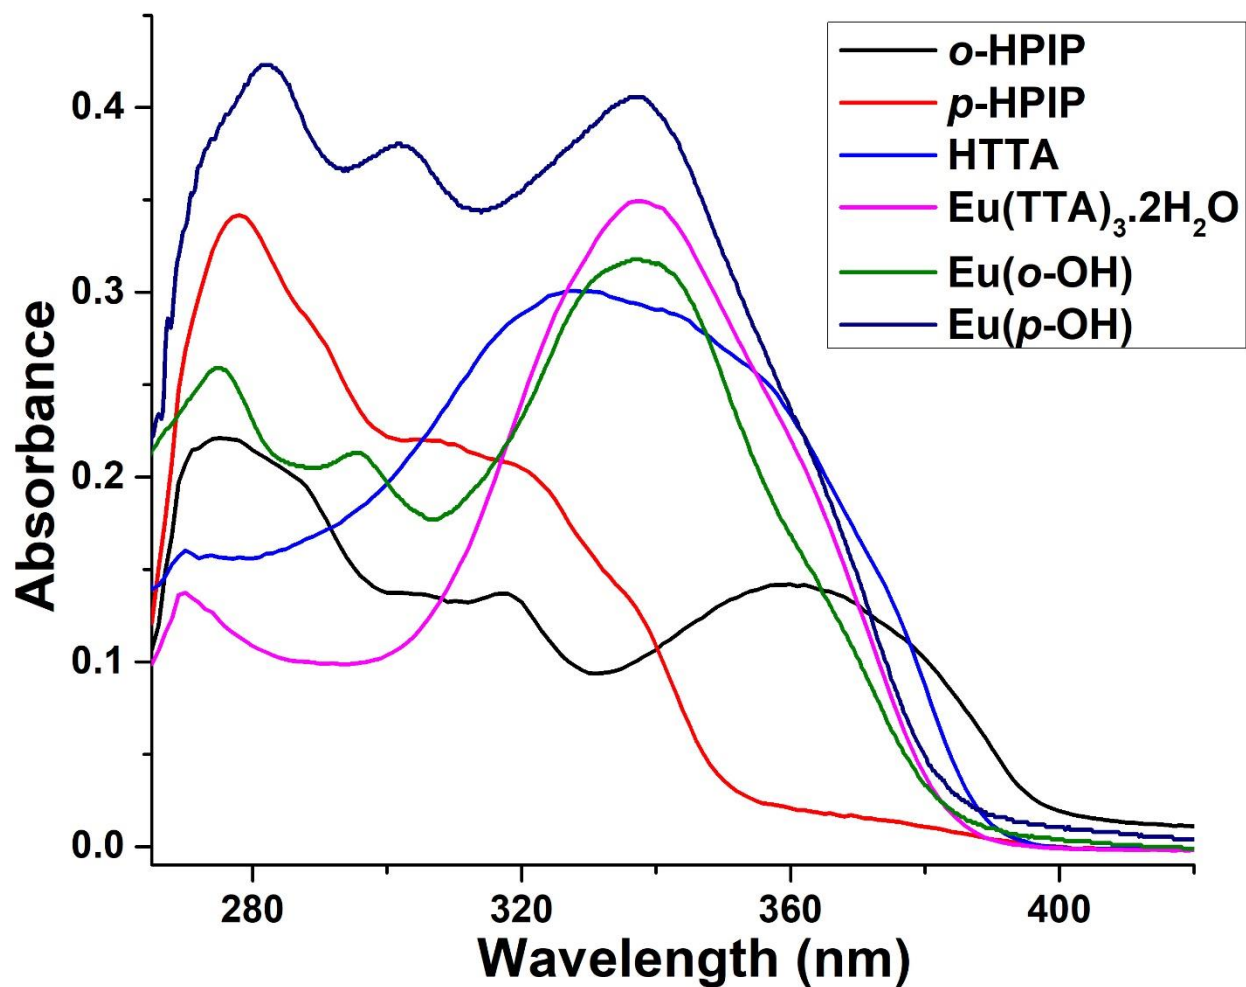

**Figure S8.** Electronic absorption spectra of the ligands (*o/p*-HPIP and TTA) (15  $\mu\text{M}$ ),  $\text{Eu}(\text{TTA})_3 \cdot 2\text{H}_2\text{O}$  (5  $\mu\text{M}$ ) and complex  $\text{Eu}(\textit{o}\text{-OH})$  and  $\text{Eu}(\textit{p}\text{-OH})$  (5  $\mu\text{M}$ ) in MeCN at 298 K.

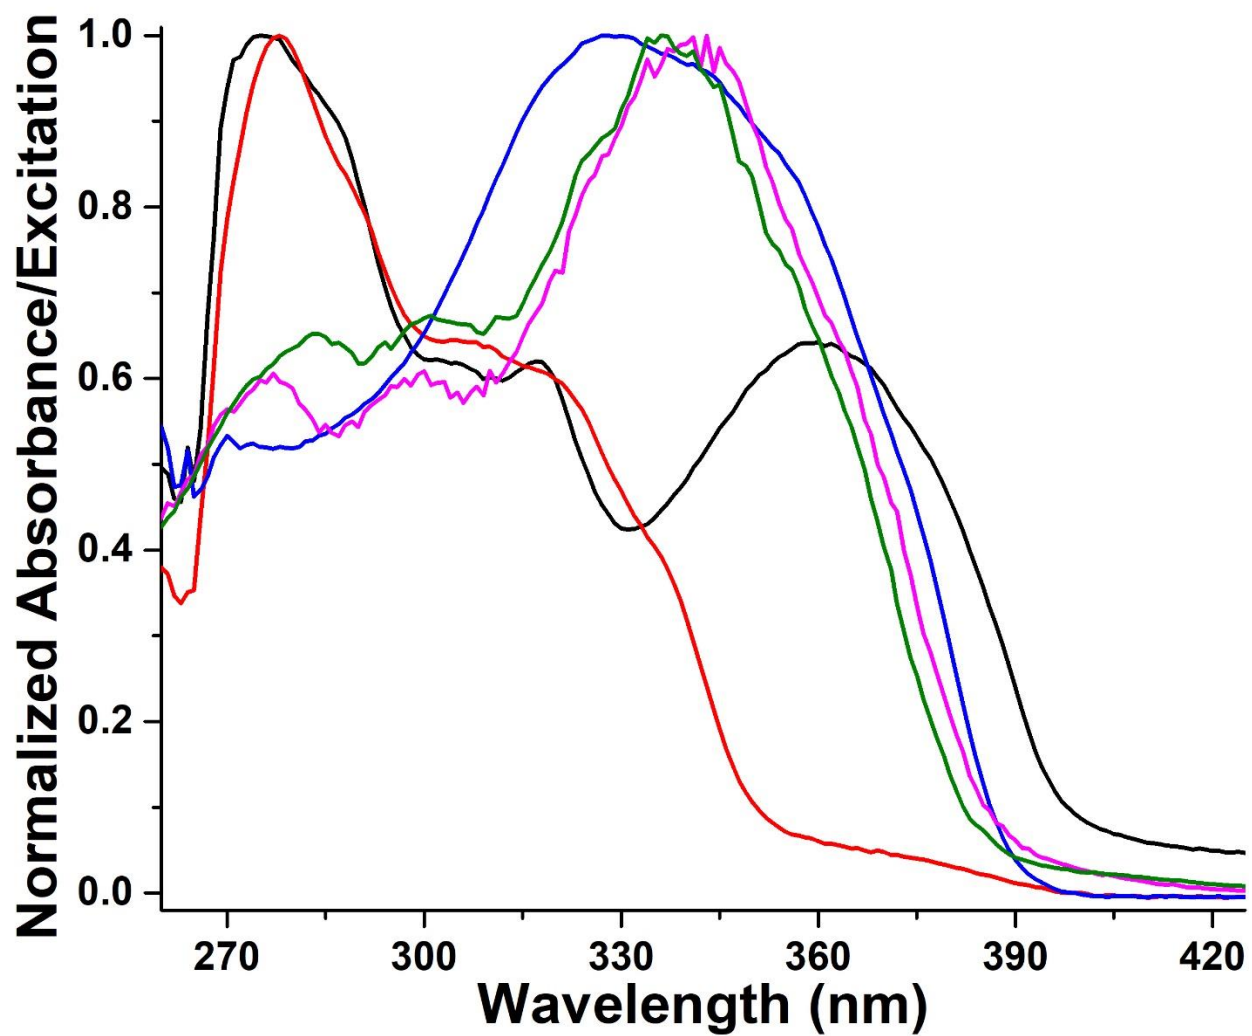

**Figure S9.** Electronic absorption spectra of the ligands (*o/p*-HPIP and TTA) ( $15 \mu\text{M}$ ) and excitation spectra of the complexes **Eu(*o*-OH)** and **Eu(*p*-OH)** ( $5 \mu\text{M}$ ) in MeCN at 298 K.

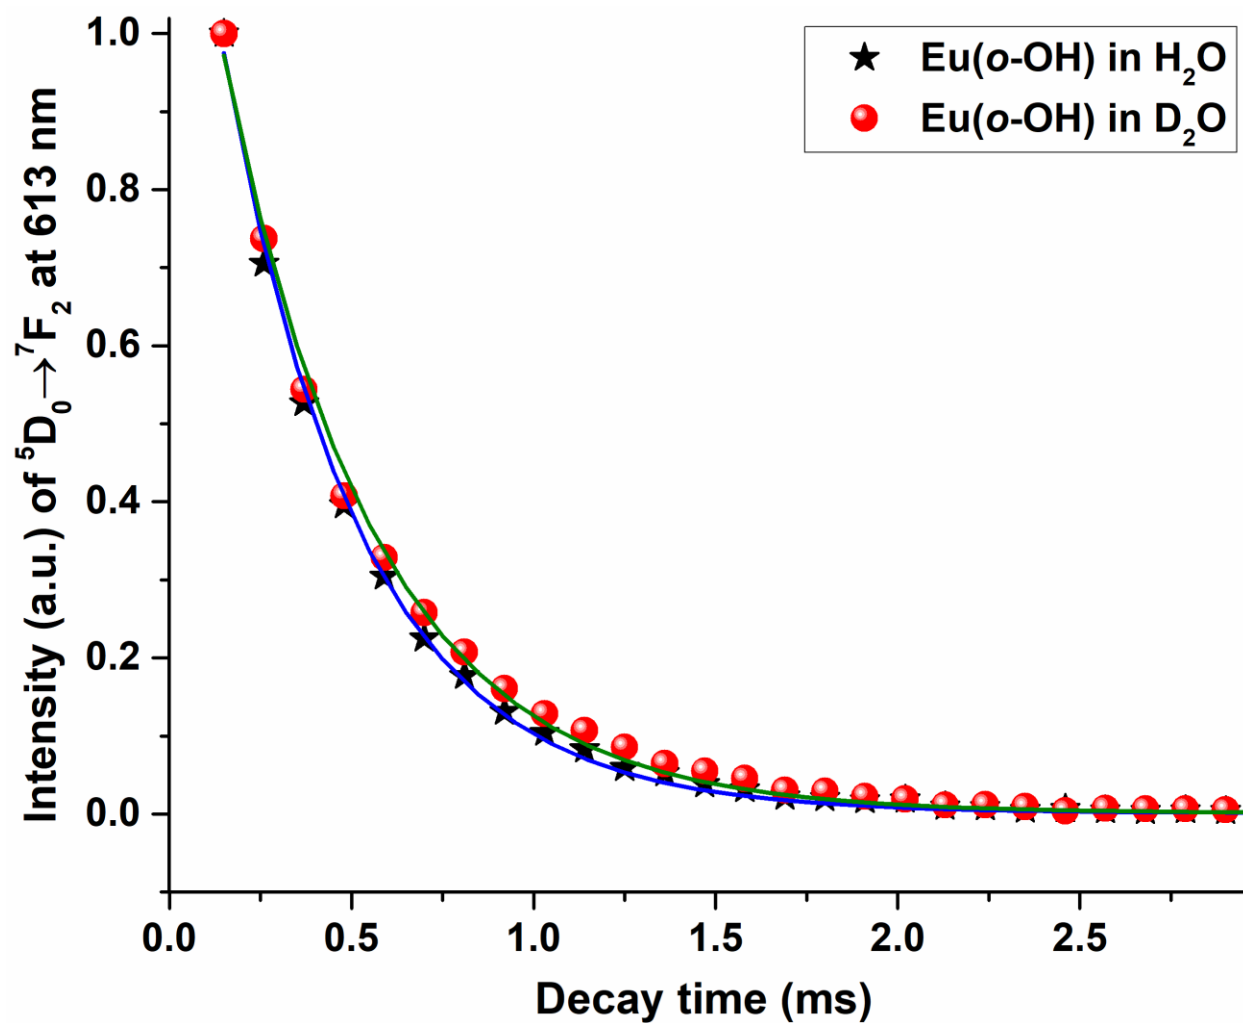

**Figure S10.** Luminescence decay profile of  ${}^5D_0 \rightarrow {}^7F_2$  transition and lifetime measurements for complex  $\text{Eu}(o\text{-OH})$  in  $\text{H}_2\text{O}$  and  $\text{D}_2\text{O}$  ( $5 \mu\text{M}$ ) at 298 K.  $\lambda_{\text{ex}} = 340 \text{ nm}$ , delay time and gate time = 0.1 ms, total decay time = 10.0 ms, Ex. and Em. Slit width = 5 nm.

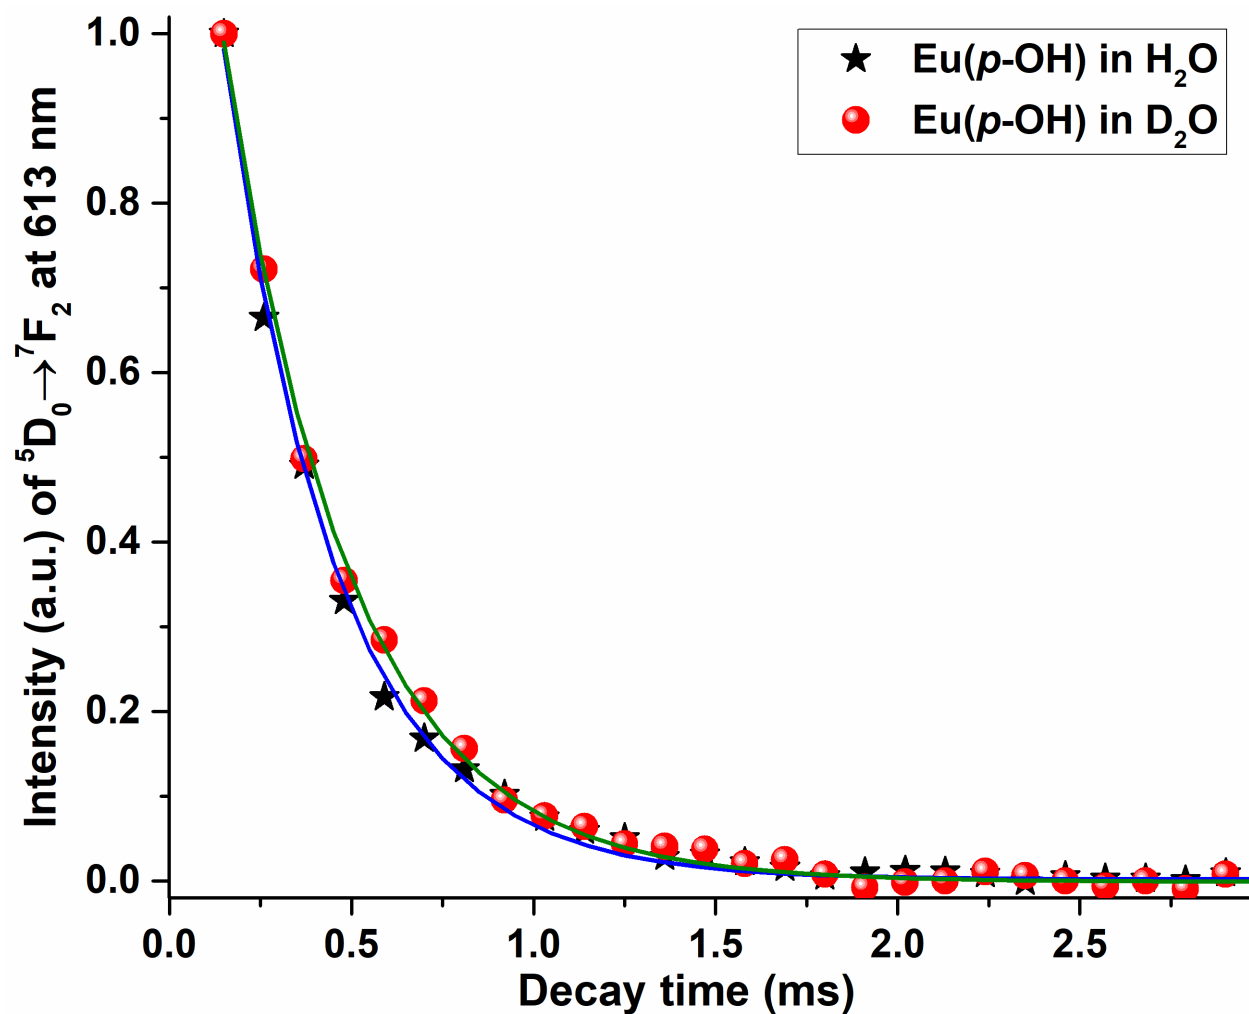

**Figure S11.** Luminescence decay profile of  ${}^5D_0 \rightarrow {}^7F_2$  transition and lifetime measurements for complex  $\text{Eu}(p\text{-OH})$  in  $\text{H}_2\text{O}$  and  $\text{D}_2\text{O}$  ( $5 \mu\text{M}$ ) at 298 K.  $\lambda_{\text{ex}} = 340 \text{ nm}$ , delay time and gate time = 0.1 ms, total decay time = 3.0 ms, Ex. and Em. Slit width = 5 nm.



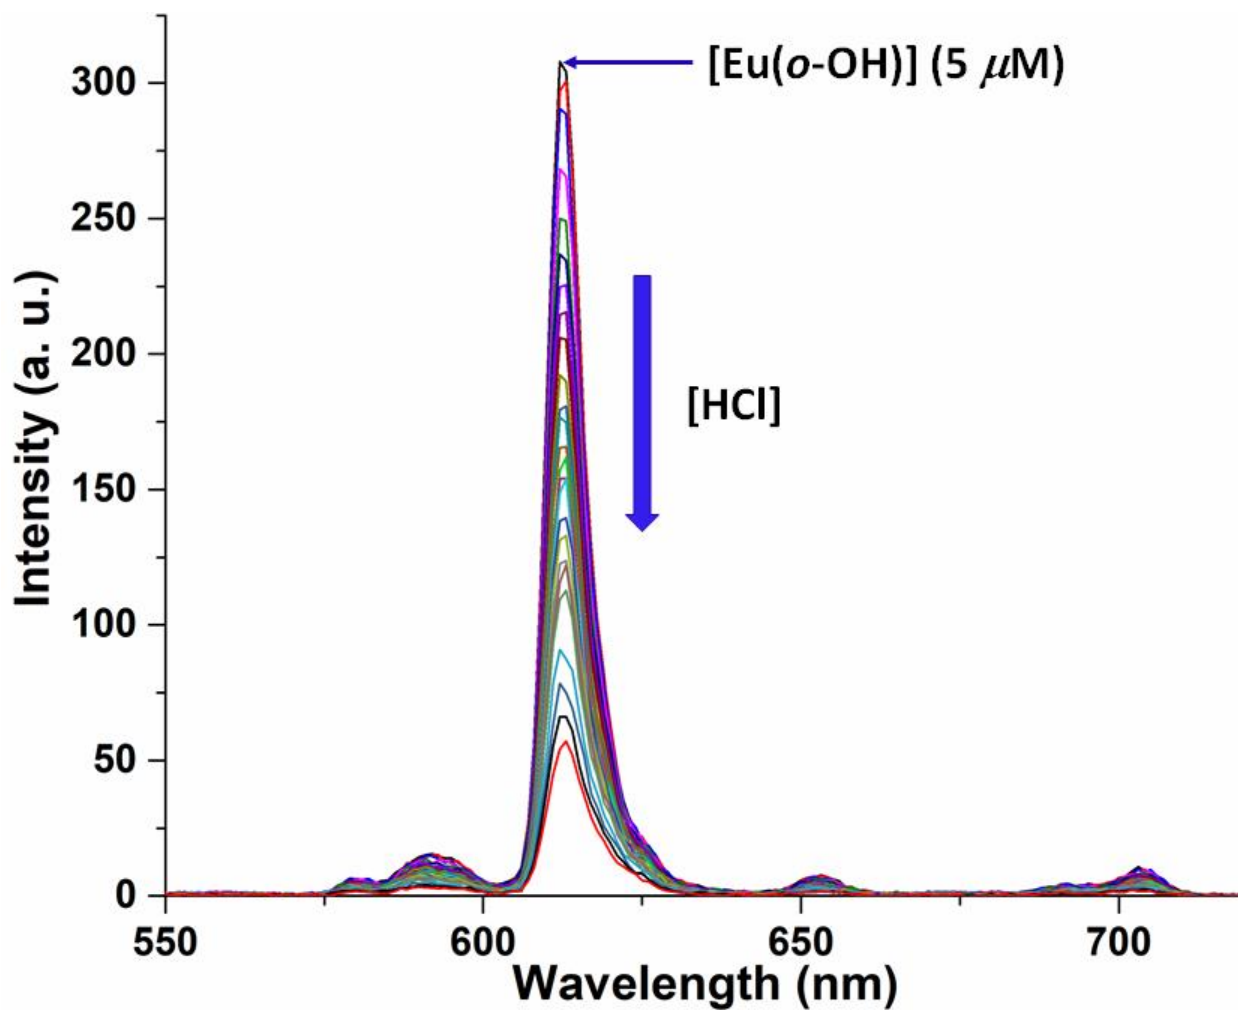

**Figure S12.** Changes in the PL spectra ( $\lambda_{\text{ex}} = 340 \text{ nm}$ ) of  $\text{Eu}(\text{o-OH})$  ( $5 \mu\text{M}$ ) with the increasing concentration of  $\text{HCl}$  ( $0\text{-}30 \mu\text{M}$ ) observed at characteristic emission from the hypersensitive band of  $\text{Eu}(\text{III})$  ion ( ${}^5D_0 \rightarrow {}^7F_2 = 613 \text{ nm}$ ).

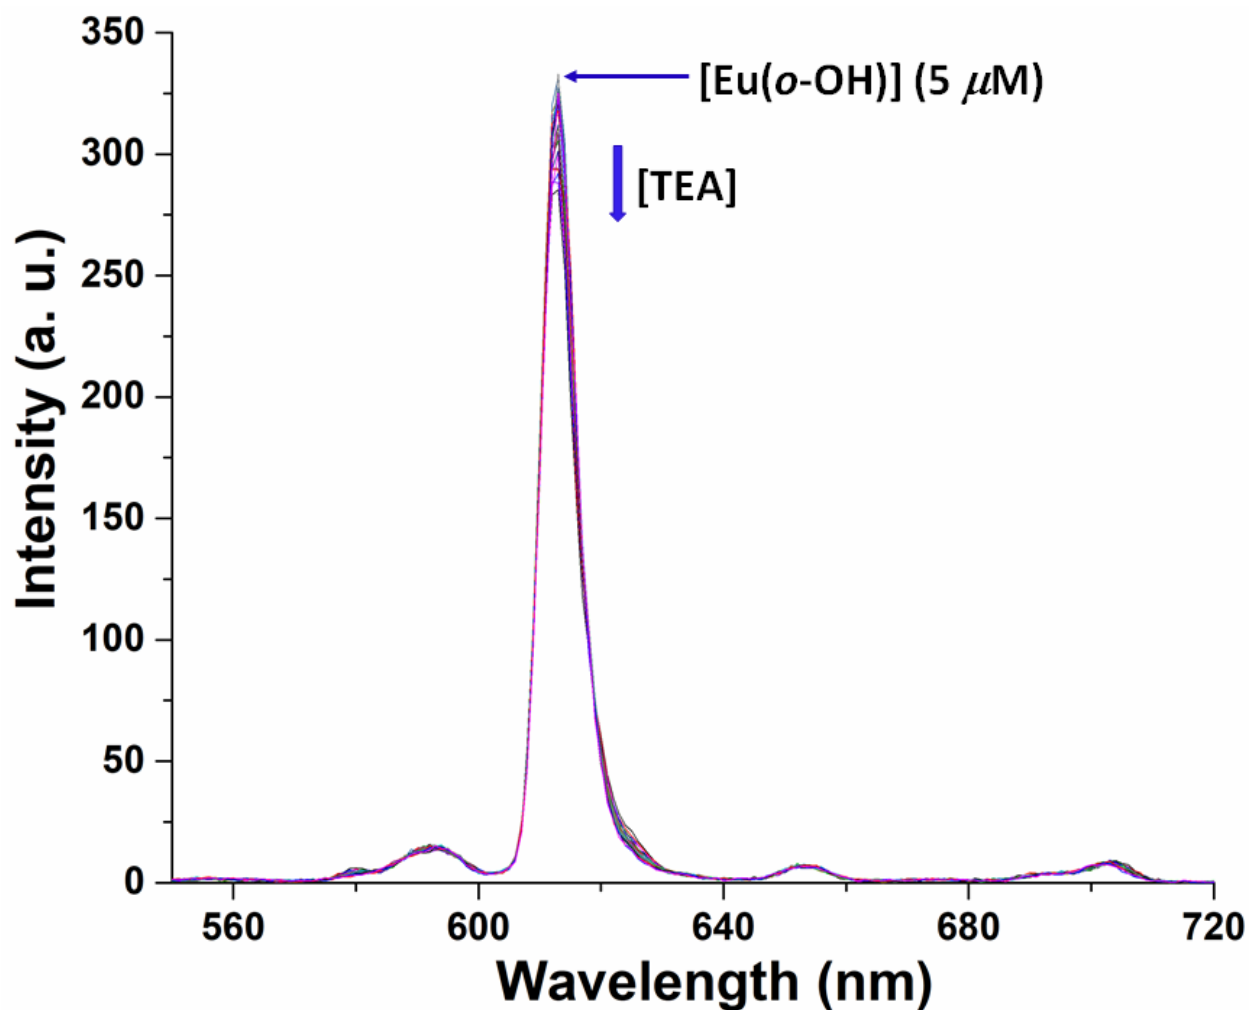

**Figure S13.** Changes in the PL spectra ( $\lambda_{\text{ex}} = 340 \text{ nm}$ ) of  $\text{Eu}(\text{o-OH})$  ( $5 \mu\text{M}$ ) with the increasing concentration of triethylamine (**TEA**) ( $0\text{-}50 \mu\text{M}$ ) observed at characteristic emission from the hypersensitive band of Eu(III) ion ( ${}^5D_0 \rightarrow {}^7F_2 = 613 \text{ nm}$ ).

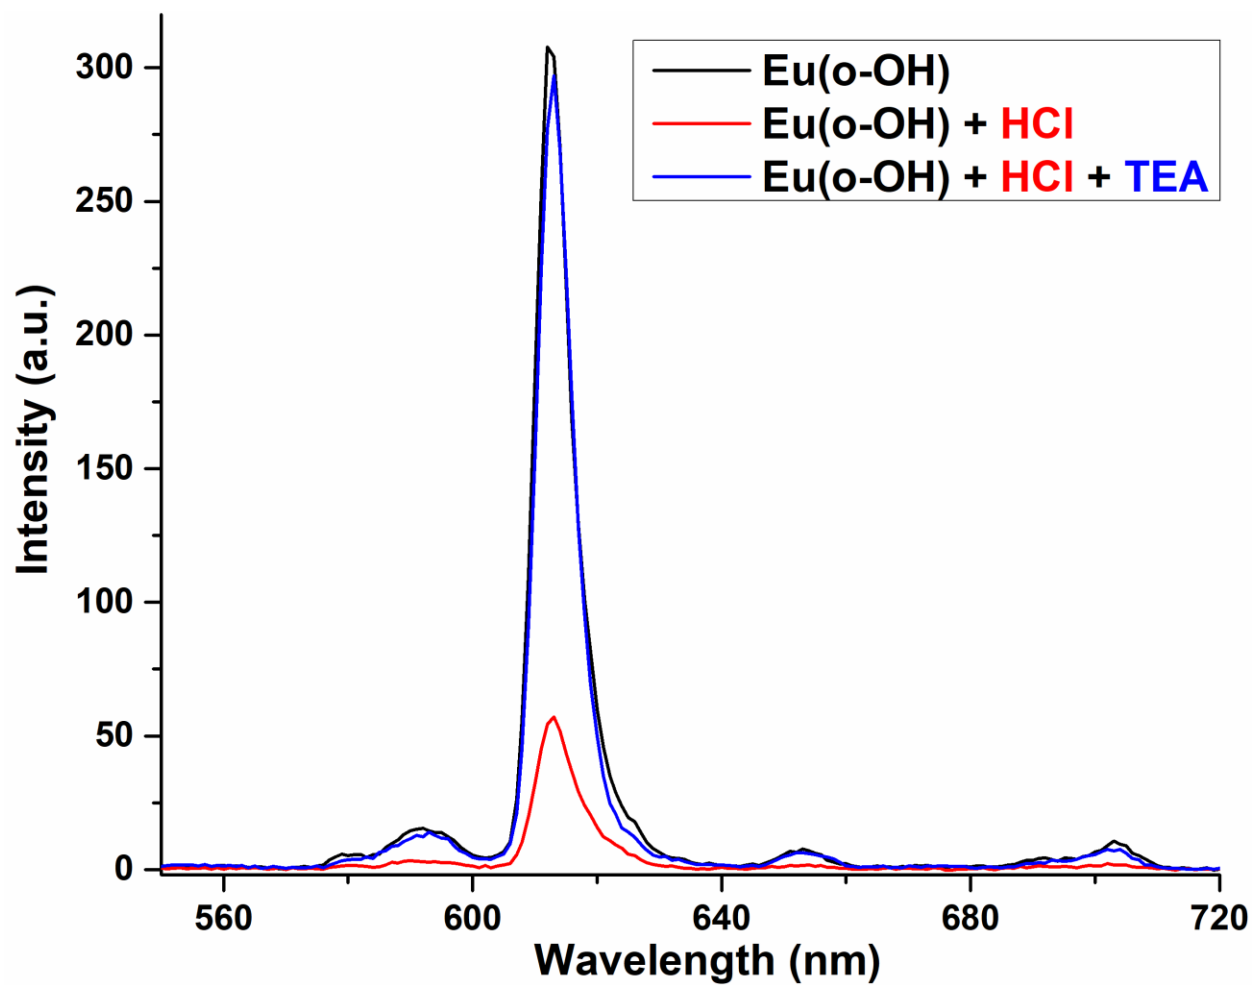

**Figure S14.** Reversible changes in the PL ( $\lambda_{\text{ex}} = 340 \text{ nm}$ ) of **Eu(o-OH)** ( $5 \mu\text{M}$ ) with the addition of **HCl** ( $0\text{-}30 \mu\text{M}$ ) followed by the addition of **TEA** ( $0\text{-}30 \mu\text{M}$ ) observed at characteristic emission from the hypersensitive band of Eu(III) ion ( ${}^5D_0 \rightarrow {}^7F_2 = 613 \text{ nm}$ ).

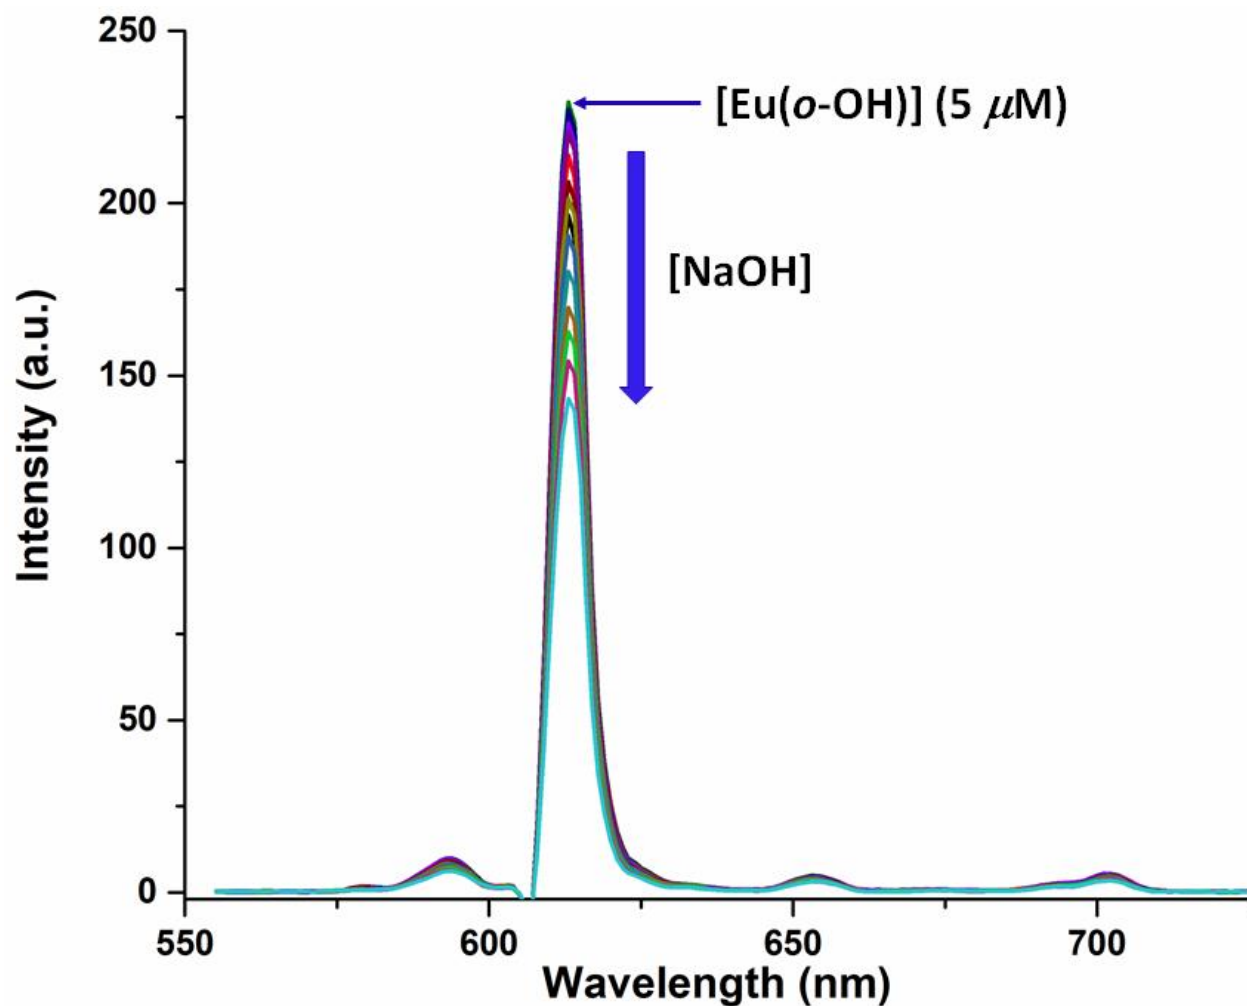

**Figure S15.** Changes in the PL spectra ( $\lambda_{\text{ex}} = 340 \text{ nm}$ ) of **Eu(*o*-OH)** ( $5 \mu\text{M}$ ) with the increasing concentration of **NaOH** ( $0\text{-}7.5 \mu\text{M}$ ) observed at characteristic emission from the hypersensitive band of Eu(III) ion ( ${}^5D_0 \rightarrow {}^7F_2 = 613 \text{ nm}$ ).

### NMR titration studies of $[\text{La}(\text{o-HPIP})(\text{TTA})_3]$ with DCP in $\text{DMSO-d}_6$

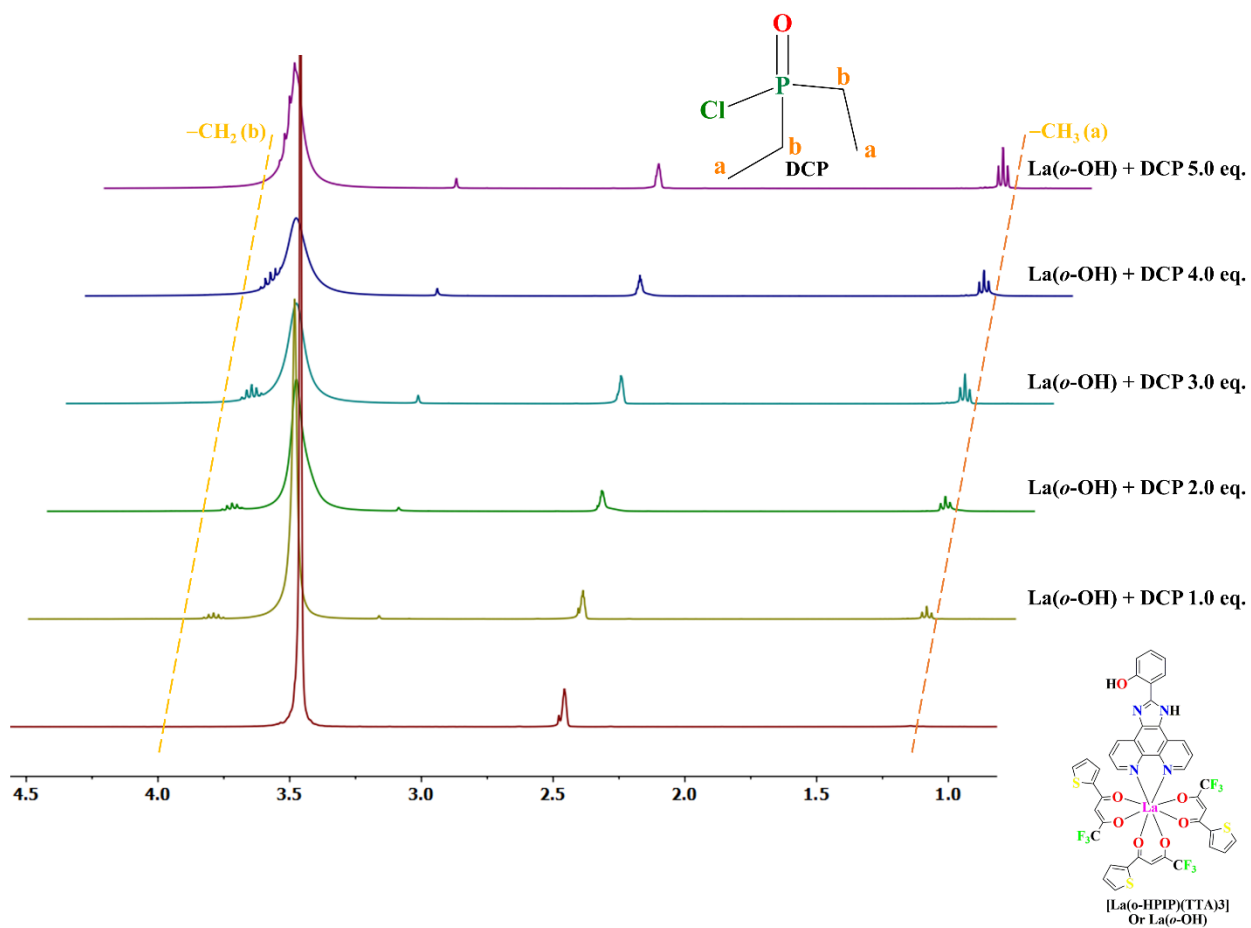

**Figure S16.** Overlaid  $^1\text{H-NMR}$  signals of the  $\text{La}(\text{o-OH})$  (20 mM) in the aliphatic region of the spectrum with the gradual addition of DCP (0-100 mM).

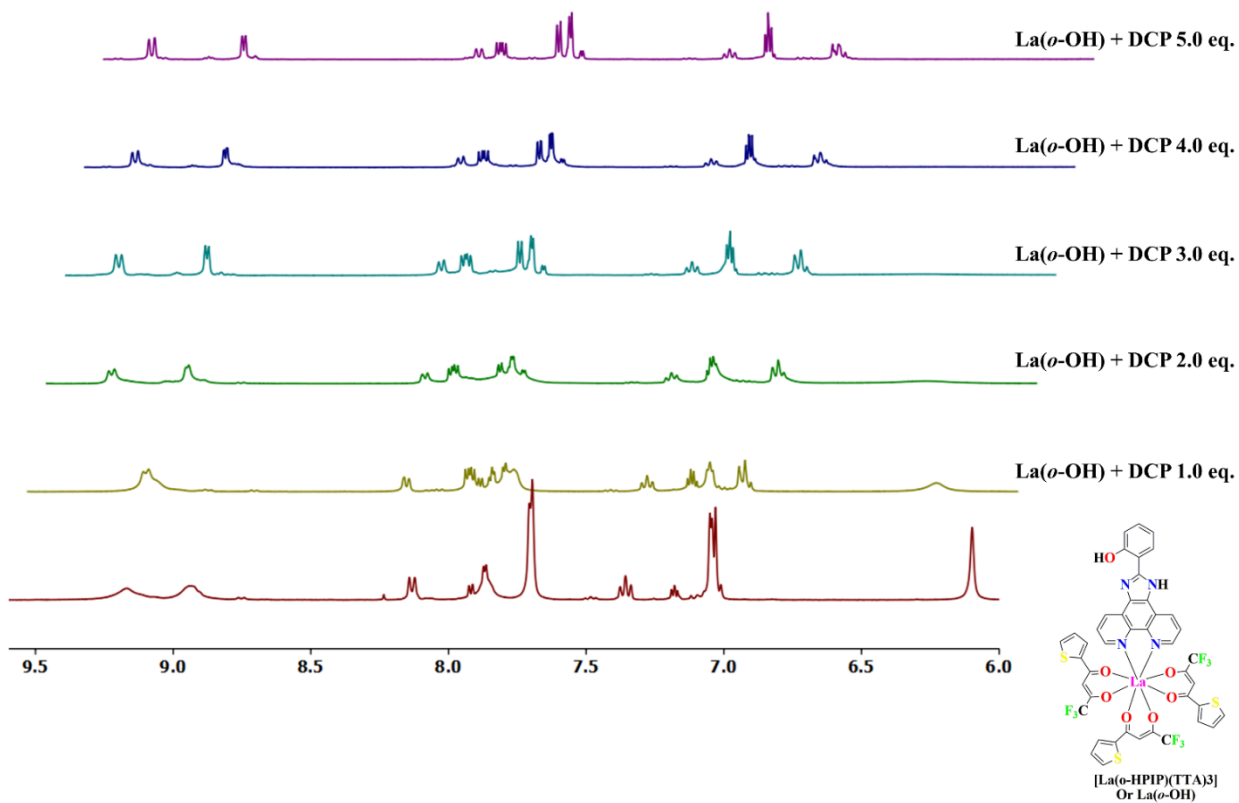

**Figure S17.** Overlaid  $^1\text{H}$ -NMR signals of the  $\text{La}(o\text{-OH})$  (20 mM) in the aromatic region of the spectrum with the gradual addition of DCP (0-100 mM).

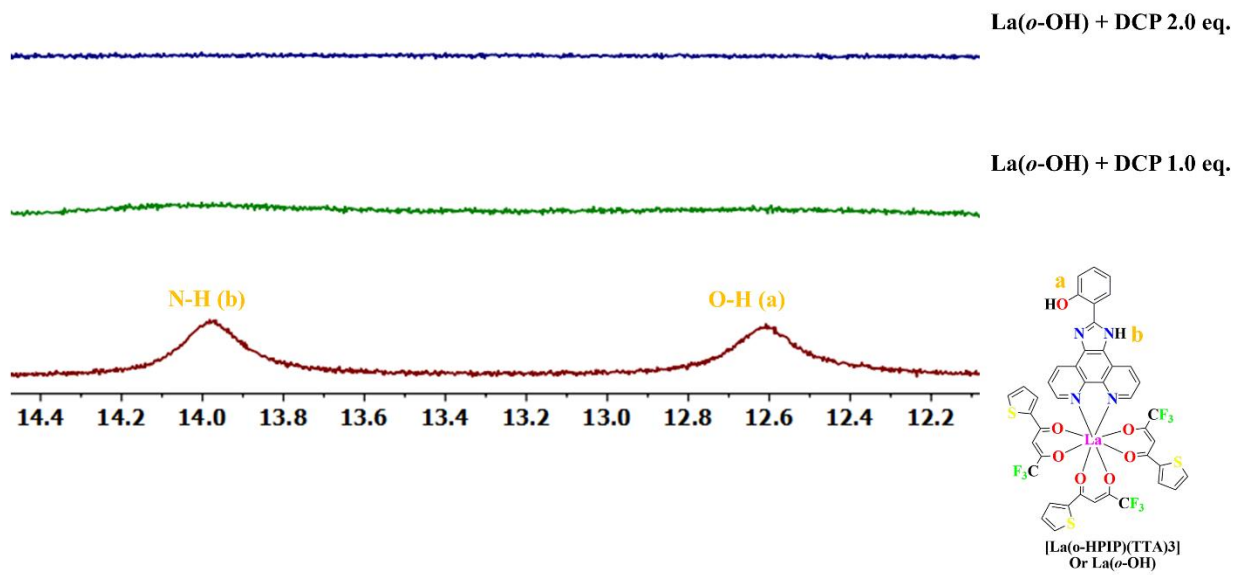

**Figure S18.** Overlaid  $^1\text{H}$ -NMR signals of the **La(o-OH)** (20 mM) showing the broad signals corresponding to O-H and N-H proton disappears with gradual addition of DCP (0-40 mM) due to proposed phosphorylation reaction.

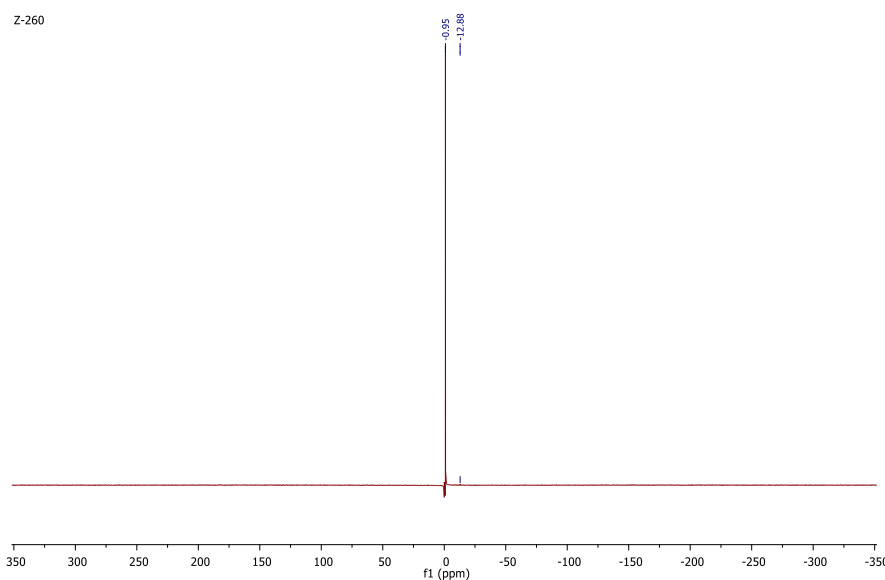

**Figure S19.**  $^{31}\text{P}$ -NMR signals of the **La(o-OH)** (20 mM) showing a single sharp signal after the addition of DCP (100 mM).

**Limit of Detection Calculations:**

$$\text{LOD} = 3.3\sigma/s$$

Where,  $\sigma$  is the standard deviation of the regression line and  $s$  is the slope of the curve.

For **Eu(o-OH)**,  $s = 0.3724$  and  $\sigma = 0.0124$

For **Eu(p-OH)**,  $s = 0.5442$  and  $\sigma = 0.0092$

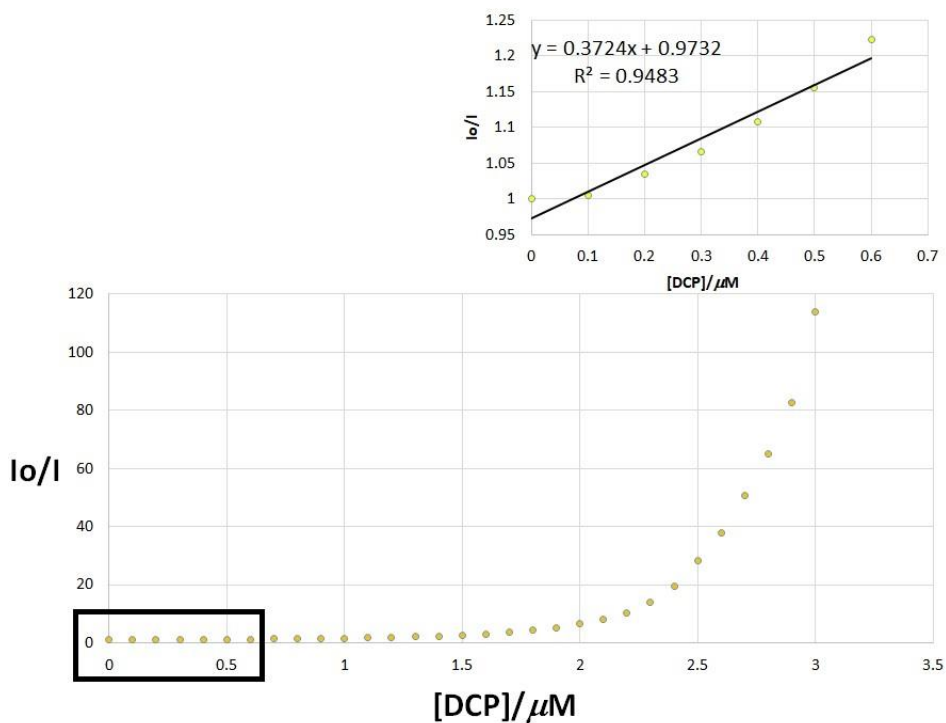

**Figure S20.** Representation of plot from the luminescence titration for the calculation of limit of detection (LOD) for DCP from the line of regression for **Eu(o-OH)** probe.



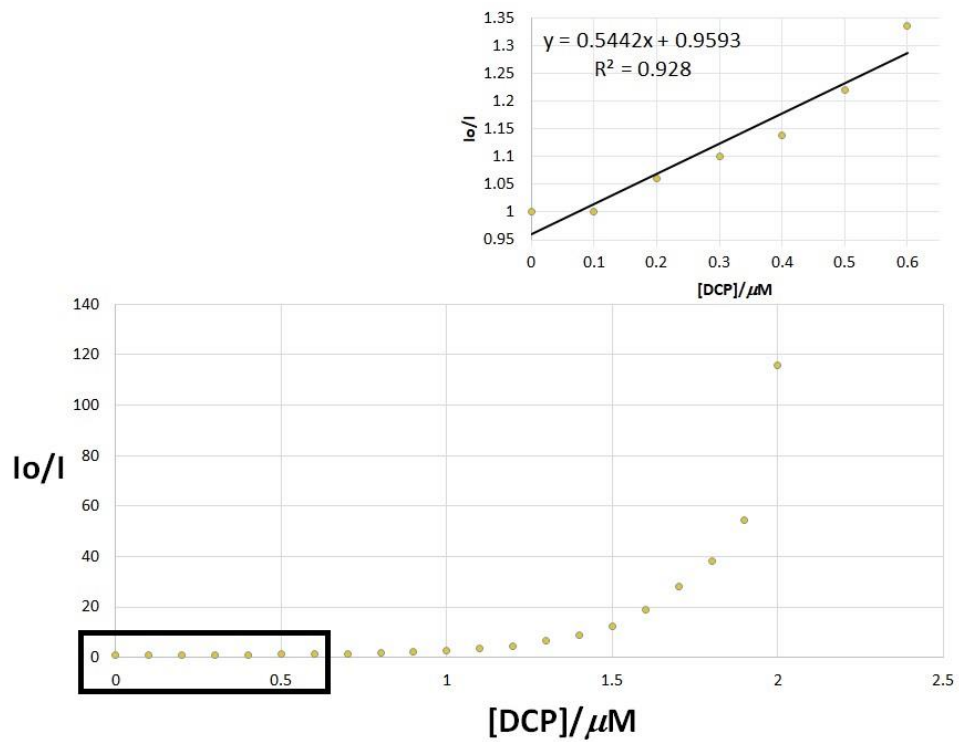

**Figure S21.** Representation of plot for the calculation from the luminescence titration for the calculation of limit of detection (LOD) from the line of regression for **Eu(p-OH)** probe.
